# 1 Entorhinal neurons exhibit cue locking in rodent VR

## 2 **Author list and affiliations**

3 Giulio Casali<sup>1\*</sup>, Sarah Shipley<sup>1</sup>, Charlie Dowell<sup>1</sup>, Robin Hayman<sup>1,2</sup>, Caswell Barry<sup>1\*</sup>

4 <sup>1</sup> Department of Cell and Developmental Biology, University College London, London, UK.

5 <sup>2</sup> Institute of Neurology, University College London, London, UK.

6 \*Lead contact and corresponding authors: Giulio Casali ([g.casali@ucl.ac.uk](mailto:g.casali@ucl.ac.uk)) and Caswell Barry  
7 ([caswell.barry@ucl.ac.uk](mailto:caswell.barry@ucl.ac.uk))

## 8 **Abstract**

9 The regular firing pattern exhibited by medial entorhinal (mEC) grid cells of locomoting rodents is  
10 hypothesized to provide spatial metric information relevant for navigation. The development of virtual reality  
11 (VR) for head-fixed mice confers a number of experimental advantages and has become increasingly popular  
12 as a method for investigating spatially-selective cells. Recent experiments using 1D VR linear tracks have  
13 shown that some mEC cells have multiple fields in virtual space, analogous to grid cells on real linear tracks.  
14 We recorded from the mEC as mice traversed virtual tracks featuring regularly spaced repetitive cues and  
15 identified a population of cells with multiple firing fields, resembling the regular firing of grid cells. However,  
16 further analyses indicated that many of these were not, in fact, grid cells because: 1) When recorded in the  
17 open field they did not display discrete firing fields with six-fold symmetry; 2) In different VR environments  
18 their firing fields were found to match the spatial frequency of repetitive environmental cues. In contrast, cells  
19 identified as grid cells based on their open field firing patterns did not exhibit cue locking. In light of these  
20 results we highlight the importance of controlling the periodicity of the visual cues in VR and the necessity of  
21 identifying grid cells from real open field environments in order to correctly characterise spatially modulated  
22 neurons in VR experiments.

## 23 Introduction

24 Since their discovery, the striking regularity of grid cell firing patterns has been proposed to play a role in  
25 encoding travelled distances and are widely held to be a core component of a circuit necessary for the  
26 integration of self-motion cues – ‘path integration’ (Burak and Fiete, 2009; Burgess, 2008; Hafting et al., 2005;  
27 McNaughton et al., 2006; Winter et al., 2015). Equally, the influence of the sensory environment on grid cell  
28 firing is also well established. In rodents, manipulations made to familiar spatial cues result in commensurate  
29 changes to grid-patterns (Hafting et al., 2005; Barry et al., 2007; Stensola et al., 2012), in geometrically  
30 polarised environments firing is distorted (Krupic et al., 2015; Stensola et al., 2015; Krupic et al., 2018), and in  
31 darkness their spatially periodic activity can break down completely (Chen et al., 2016; Pérez-Escobar et al.,  
32 2016).

33 Hence, it appears that while grid cell activity is shaped by self-motion information (Winter et al., 2015),  
34 sensory access to landmarks is necessary to maintain stable spatial firing (Campbell et al., 2018; Hardcastle et  
35 al., 2015; Muessig et al., 2015). Further, the relative efficacy of these two sources of information (‘self-motion’  
36 vs ‘landmark’) appears to change dynamically with experience. For example, when rats first explored a pair of  
37 visually identical enclosures connected by a corridor, grid cell firing in the enclosures was highly similar,  
38 suggesting a dominance of landmark-based information. However, with prolonged experience, grid-patterns  
39 disambiguated the two sides, forming a single global representation of the space, consistent with increasing  
40 emphasis being placed on self-motion cues (Carpenter et al., 2015). Similarly, computational work has also  
41 highlighted the necessity of landmark information as a means to reset accumulated errors in path integration  
42 networks (Banino et al., 2018; Burgess and Burgess, 2014). However, the mechanisms by which this reset  
43 occurs and by which the relative importance of different information sources can be modulated remains  
44 unclear.

45 Rodent virtual reality (VR) provides a powerful and increasingly popular experimental tool capable of  
46 manipulating the characteristics of an animal’s environment, thus offering an ideal means to address such  
47 issues (Thurley and Ayaz, 2017). Indeed, a number of studies have examined the responses of neurons  
48 recorded from the entorhinal and hippocampal networks in both 1D (Harvey et al., 2009; Dombeck et al., 2010;  
49 Domnisoru et al., 2013; Schmidt-Hieber and Häusser, 2013; Campbell et al., 2018) and 2D (Aronov and Tank,  
50 2014; Chen et al., 2018). However, many cell types in these brain regions (e.g. grid cells, boundary vector cells  
51 and, to a certain extent, place cells) are typically identified from their open field firing patterns recorded during  
52 real environment foraging tasks. As such, it can be challenging to positively identify a neuron recorded solely  
53 from a 1D VR recording.

54 Therefore, to better understand how landmark and path integration information interact we  
55 recorded mEC grid cells as head-fixed mice ran through three distinct 1D VR environments, each consisting of

56 different sets of regularly repetitive spatial cues. Our rationale was to explore the effects of repetitive spatial  
57 cues on grid and non-grid cell activity. Subsequently cells were classified as grid or non-grid cells based on  
58 their activity recorded during foraging in real 2D environments. In the case of grid cells, we found no evidence  
59 that grid-patterns were reset to a constant phase by each cue occurrence, thus pointing to a strong influence  
60 of path integration cues. However, we identified a population of non-grid neurons that did exhibit pronounced  
61 cue-locking, firing with a constant spatial relationship to each cue occurrence. In the repetitive environments  
62 used here, these cells appeared to have strongly periodic spatial firing and were erroneously categorised as  
63 grid cells by a measure previously used to identify grid cells under such circumstances (Domnisoru et al., 2013).  
64 We highlight the importance that 2D recordings play in the positive identification of spatial cell types that, like  
65 grid cells, are defined by their functional properties. Moreover, the presence of a class of neurons in mEC  
66 responding solely to visual landmark cues is novel and raises several questions regarding their contribution to  
67 the cognitive spatial network which we aim to answer with future experiments.

## 68 Results

69 In total, 690 unique superficial mEC neurons were recorded from 4 male C57BL/6 mice during the  
70 course of 12 experimental sessions. At the end of each recording session tetrodes were advanced by a  
71 minimum of 50 $\mu$ m to avoid sampling of the same cells. *Post-hoc* examination of histology confirmed tetrode  
72 track location in superficial layers of left mEC.

73 In each session, mice initially foraged in a real world (RW) 2D environment for randomly thrown drops  
74 of soya milk (SMA, Wysoy), and after a minimum break of 10 minutes were head-fixed and left in darkness for  
75 about 5 minutes before a virtual reality (VR) session commenced (**Supp. Fig 6**).

76 In each session, animals ran in three different 1D VR environments (A, B, and C), performing traversals  
77 for liquid reward delivered at a fixed goal location near the end of the track before being teleported back to  
78 the start of the track. Each environment was comprised of repeated segments containing a number of visual  
79 cues (**Supp. Fig 2**). Trials in each environment were a minimum of 20 minutes duration.

80 In total 15 grid cells from 2 animals were identified based on spatial firing in the RW open field  
81 (gridness score vs. 95<sup>th</sup> percentile of a shuffled distribution, mean grid score of identified cells =  $0.58 \pm 0.07$ ,  
82 see Methods). Visual inspection confirmed that on the VR linear tracks these grid cells exhibited multiple  
83 spatially localised firing fields (**Figure 1A**) having similar firing rates between VR and RW (mean firing rate:  
84 RW =  $1.3 \pm 0.2$  Hz, VR =  $1.1 \pm 0.4$  Hz, Wilcoxon signed ranked test:  $P = 0.07$ ; peak firing rate: RW =  $5.4 \pm 1.6$  Hz,  
85 VR =  $4.7 \pm 1.5$  Hz, Wilcoxon signed ranked test:  $P = 0.08$ ) but reduced stability in VR compared to RW (first vs  
86 second half correlation: RW =  $0.48 \pm 0.05$ , VR =  $0.07 \pm 0.03$ , Wilcoxon signed ranked test:  $P = 0.0005$ ).

87 Surprisingly, based on their activity in VR, relatively few of these cells were positively identified as grid  
88 cells. Specifically, using a method for grid cell categorisation developed for VR environments less repetitive  
89 than the ones used here (Domnisoru et al., 2013), in environment A, 2 of 15 cells were correctly classified as  
90 grid cells, in B 5 out of 15, and in C 3 of 15. These proportions which were not dissimilar to that of the whole  
91 ensemble of mEC cells: A = 106/690, binomial test:  $P = 0.99$ , B = 145/690, binomial test:  $P = 0.17$ , C = 108/690:  
92 binomial test:  $P = 0.45$ . Equally, the same criteria classified 74 of the 690 (10.7%) mEC neurons as grid cells  
93 based on their 1D VR activity, only 2 of which were also classified as grid cells based on their RW open field  
94 activity (gridness > 95<sup>th</sup> of shuffle) (**Figure 1B**; grid score =  $-0.11 \pm 0.03$ , stability =  $0.17 \pm 0.03$ , spatial  
95 information =  $0.34 \pm 0.05$ ). Taken together, these numbers highlight the difficulty – and in particular high false  
96 positive rate – inherent in the identification of grid cell firing from 1D spatial data.

97 Next, we examined the extent to which grid cell activity was modulated by proximity to landmark cues  
98 in the VR. For each cell we calculated the mean spatial autocorrelogram (SAC) across trials in each VR  
99 environment and then detected the dominant spatial frequency - the highest peak in the 20-180 cm range  
100 (**Figure 1C**). The number of grid cells exhibiting 'cue-locking' in the VR environments – having a dominant

101 spatial frequency matching that of the cues (see Methods) - was no greater than expected by chance (**Figure**  
 102 **1D**; A = 3/15, binomial test:  $P = 0.41$ ; B = 1/15, binomial test:  $P = 0.14$ ; C = 2/15, binomial test:  $P = 0.38$ ). Indeed,  
 103 11 grid cells were not cue-locked in any of the VR environment, 2 were cue-locked in a single rate environment and  
 104 2 were cue-locked in 2 environments, with none of the grid cells being cue-locked in all three environments.  
 105 Thus, grid cells – identified from the open field – showed no obvious tendency to be reset or modulated by  
 106 the repetitive visual cues.  
 107

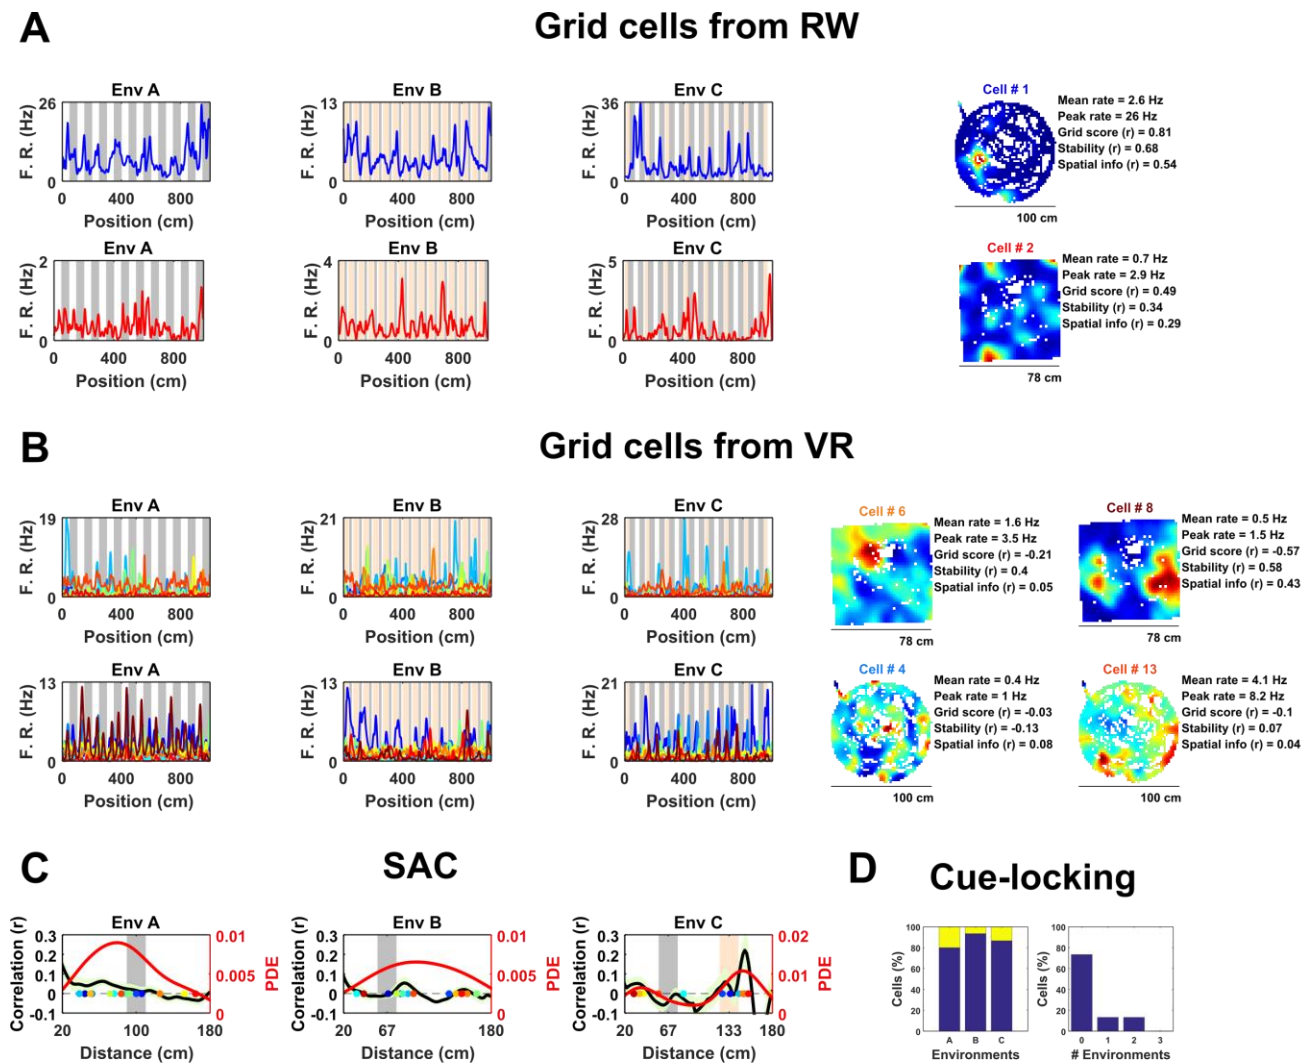

108  
 109 **Figure 1. Spatially periodic activity in real (RW) and virtual (VR) environments, a subset of non-grid mEC cells**  
 110 **show cue-locking in VR environments.**

111 **A**, Spatial activity from two example grid cells – identified based on RW recordings (*right*) – in each of the three  
 112 VR environment (*left*). Repeating cues are indicated as coloured bars in the background of the VR plots. Cells  
 113 are colour coded such that the title on RW ratemaps matches line colour on the VR plots. **B**, Similar to **A**, spatial  
 114 activity from two cells which were (incorrectly) classified as grids cells based on VR activity (*left*) but not based  
 115 on RW open field activity (*right*). Despite the regularity of their firing patterns in VR, these cells showed no  
 116 clear grid-like firing in RW and only limited spatial responses. **C**, Cue-locking in grid cells ( $n=15$ , identified from  
 117 RW) was investigated using spatial auto-correlograms (SACs). Plots show mean (black line)  $\pm$  SEM (light green  
 118 shade area) SACs across cells (left y-axis). Note the lack of periodicity corresponding to the frequency of cues

119 in the VR environments (indicated by grey and orange bands). The overlaid color-coded dots represent the  
120 dominant spatial frequency in the 20-180cm range detected from the SAC of each grid cell – the distribution  
121 of these points is indicated by the red line (right y-axis). **D**, Proportion of grid cells exhibiting cue-locking  
122 (yellow) and no cue-locking (blue) in each VR environment (*left*) and proportion showing cue-locking in  
123 multiple VR environments (*right*).

124 Next, we examined the spatial activity of all non-grid mEC neurons in VR (n = 675). To classify these  
125 neurons we developed a method analogous to a 1D version of the widely used gridness metric derived from  
126 the mean SAC (Sargolini et al., 2006). Briefly, cells with a maximum peak in the mean SAC exceeding the 95th  
127 percentile of single-cell shuffled distribution in at least two of the three VR environments were considered to  
128 exhibit significant spatially periodic activity. Our analysis detected 56 such cells, significantly more than  
129 expected by chance (chance = 5/675, binomial test,  $P < 0.0001$ ). Inspection of the 1D ratemaps of these cells  
130 revealed pronounced and regular modulation of their spatial activity across VR environments, whereas their  
131 firing patterns in RW indicated that these neurons were unlikely to be un-detected grid cells (**Figure 2, Supp.**  
132 **Fig. 3**).

133 Examination of their spatial firing in RW open field showed that these cells exhibited weakly spatial  
134 activity ( $0.22 \pm 0.04$  bits/spike) and no evidence of six-fold symmetry (0/56 cells exhibited significant grid  
135 scores vs. 95th percentile of a shuffled distribution, grid score =  $-0.13 \pm 0.03$ , spatial stability =  $0.14 \pm 0.03$ ,  
136 **Figure 2**, ). However, a large portion of these cells (27/56 = 47%) passed criteria for grid cell inclusion based  
137 on previously used methods to detect grid cells on 1D VR linear tracks (Domnisoru et al., 2013).

138

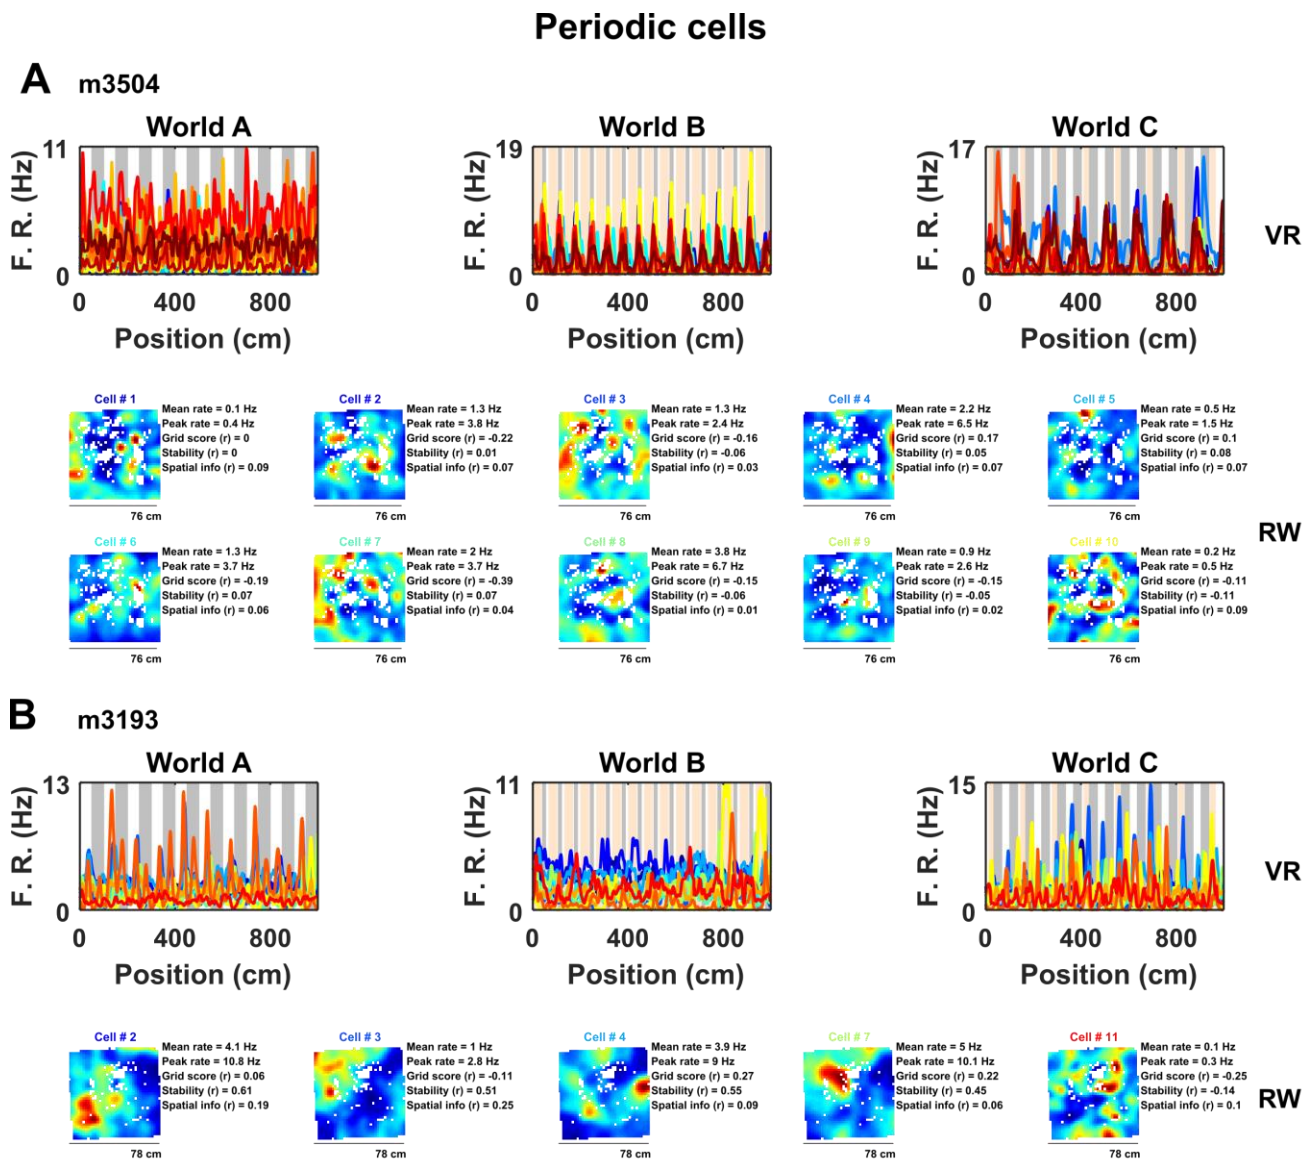

139

140

141 **Figure 2 A sub-population of non-grid cells exhibit pronounced spatial periodicity in 1D VR environments**

142 Examples of co-recorded non-grid periodic cells from 2 animals (**A**, 10 cells from mouse m3504; **B**, 5 cells from  
 143 mouse 3193) shown as ratemaps in both VR (*top row*) and RW (*bottom rows*). In VR, the firing rate of cells is  
 144 plotted against position in each environment (**A-C**) with the periodicity of repeating cues indicated in the  
 145 background (grey and pink). In RW the ratemaps of the same color-coded cells in VR are shown together with  
 146 mean and peak firing rate, grid score, stability, and spatial information. Despite the regularity of the firing  
 147 pattern patterns in VR, these cells neither showed clear grid-like firing pattern nor spatial firing of any kind in  
 148 RW.

149

150 To better characterize the nature of these non-grid periodic cells we focused on the relationship  
 151 between the visual cues in VR and their regular firing patterns. We observed that within each VR environment  
 152 the mean SAC was remarkably alike across cells, having a similar spatial frequency (**Figure 3**). However, the

153 periodicity of their activity differed between environments, and in most cases coincided with the underlying  
 154 spatial frequency of the repetitive cues in those environments (**Figure 3A**). To quantify this observation, we  
 155 repeated the analysis conducted to identify modulation of grid cells by visual cues - detecting the spatial  
 156 frequency of each cell from the peak in the mean SAC and comparing that with the spatial frequency of cues  
 157 in each environment (**Figure 3B**)— finding that these cells were strongly ‘cue-locked’ (proportion cue-locked  
 158 cells: environment A = 28/56, binomial test:  $P < 0.0001$ ; B = 34/56,  $P = < 0.0001$ ; C = 43/56,  $P < 0.0001$ ).  
 159 Moreover, only 7/56 of the periodic cells were not cue-locked in at least one of the three environments, with  
 160 16/56 being cue-locked in 1 environment, 27/56 in 2 environments and 6/56 in all 3 environments (**Figure 3C**).

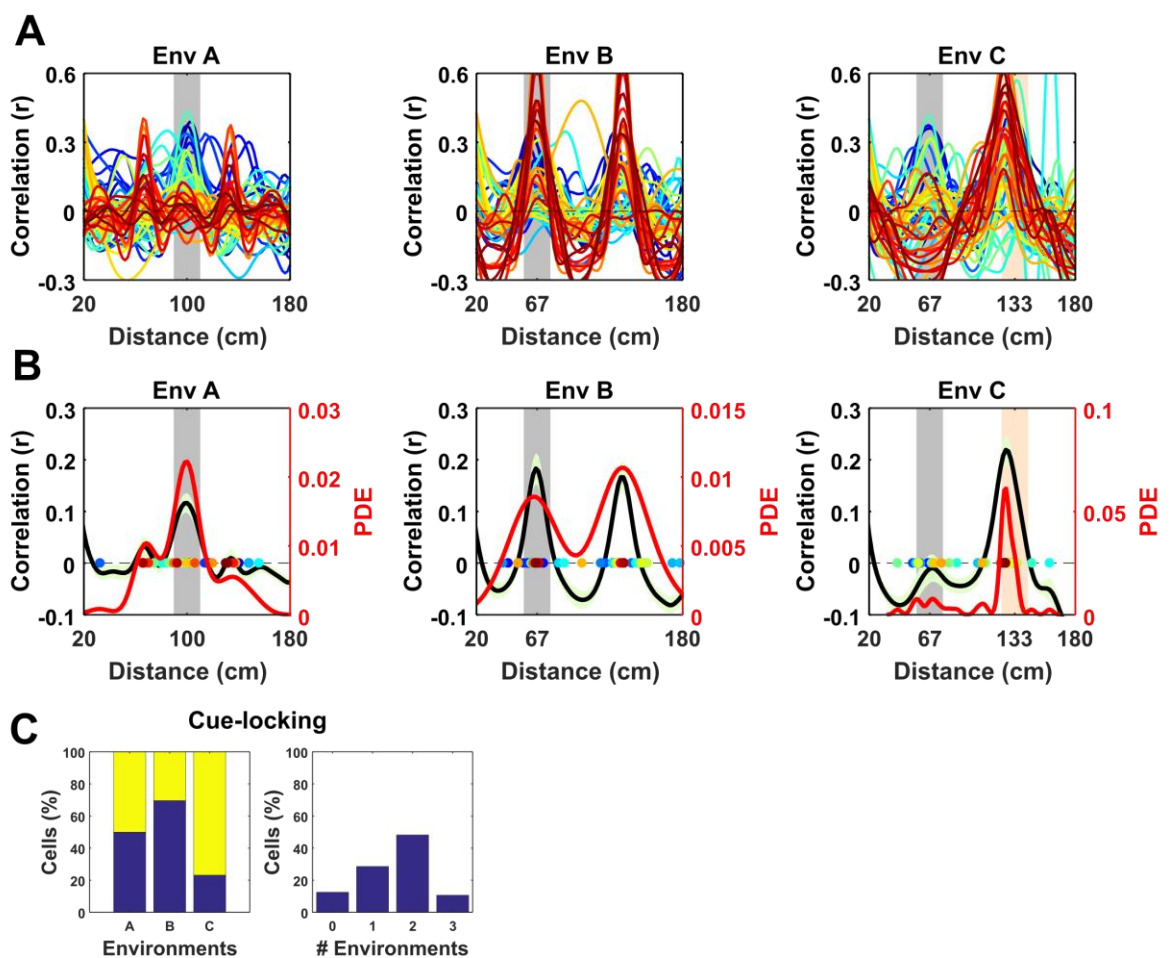

161

162 **Figure 3 Spatial frequency of the periodic non-grid cells**

163 Within VR environments, periodic non-grid cells exhibited regular firing at the same spatial frequency as the  
 164 underlying repetitive visual cues, unlike grid cells which showed weaker spatial periodicity of varying  
 165 frequencies. **A**, SAC of all non-grid periodic cells across VR environments. Note the clear peaks centred on the  
 166 spatial frequency of the repeating cues of each environment (grey block). **B**, Mean (black line)  $\pm$  S.E.M. (light  
 167 green shaded area) of the SAC (left y-axis) across cells within each environment showing clear coincidence  
 168 with the frequency of the repetitive cues (grey block). Coloured dots indicate the dominant spatial frequency



169 of each cell (colour matches lines in **A**) and were used to compute the kernel density estimate (red line, right  
170 y-axis). **C**, Histograms showing (*left*) percentages of non-cue locked (blue) and cue-locked (yellow) periodic  
171 cells within each VR environment. *Right*, Histograms showing percentages of periodic cells exhibiting cue  
172 locking in multiple environments. Most cells (>85 %) displayed cue-locking in at least one VR environments.

173

174 Together, these results suggest that the regular firing pattern exhibited by these periodic cells was  
175 strongly modulated by the repeating visual cues rather than reflecting an internally-generated path integration  
176 signal like the one hypothesized for grid cells. In support of this notion, the proportion of periodic cells  
177 exhibiting cue-locking was significantly higher than the proportion of cue locked grid cells in environments B  
178 and C ( $\chi^2 = 10.62, P = 0.0011$ ;  $\chi^2 = 20.5, P < 0.0001$ ) though not A ( $\chi^2 = 3.71, P = 0.054$ ).

179

180 Having identified a subset of non-grid cells exhibiting strong cue modulation, we next examined how  
181 their spatial responses were distributed relative to visual cues. Since the VR environments were composed of  
182 repeating linear segments, we calculated for each cell its mean rate map over the repeating unit. Visualised in  
183 this way it was clear that the spatial periodic firing of different cue locked cells had variable phases relative to  
184 the visual cues (**Figure 4A**). Moreover, when rate maps were sorted according to the location of their peak  
185 activity it was apparent that there was no strong tendency for firing to cluster at specific phases of the  
186 repeated segments (**Figure 4B**; Rayleigh test for peak density: VR environment A:  $P = 0.99$ , B:  $P = 0.99$ , C:  $P =$   
187  $0.88$ ). Finally, we examined if the relative phases at which non-periodic cells were active was conserved across  
188 environments. To test this, we focused on environments A and B which had the simplest patterns of repetitive  
189 visual cues, and cross-correlated the stacked rate maps from both environments sorted by peak location in A  
190 (**Figure 4C**). The resulting cross-correlation exhibited a single predominant peak ( $r = 0.25$ ) which exceeded the  
191 values obtained by randomly shuffling the order of the cells before cross-correlating ( $n$  shuffles = 1000, peak  
192 from shuffle  $r = 0.014 \pm 0.002$ , one-sample t-test,  $t_{999} = -101.1, P < 0.0001$ ). Taken together these results  
193 indicate that although non-grid periodic cells are strongly modulated by environmental cues there is a

194 tendency for the relative phase at which cells fire to be preserved across environments.

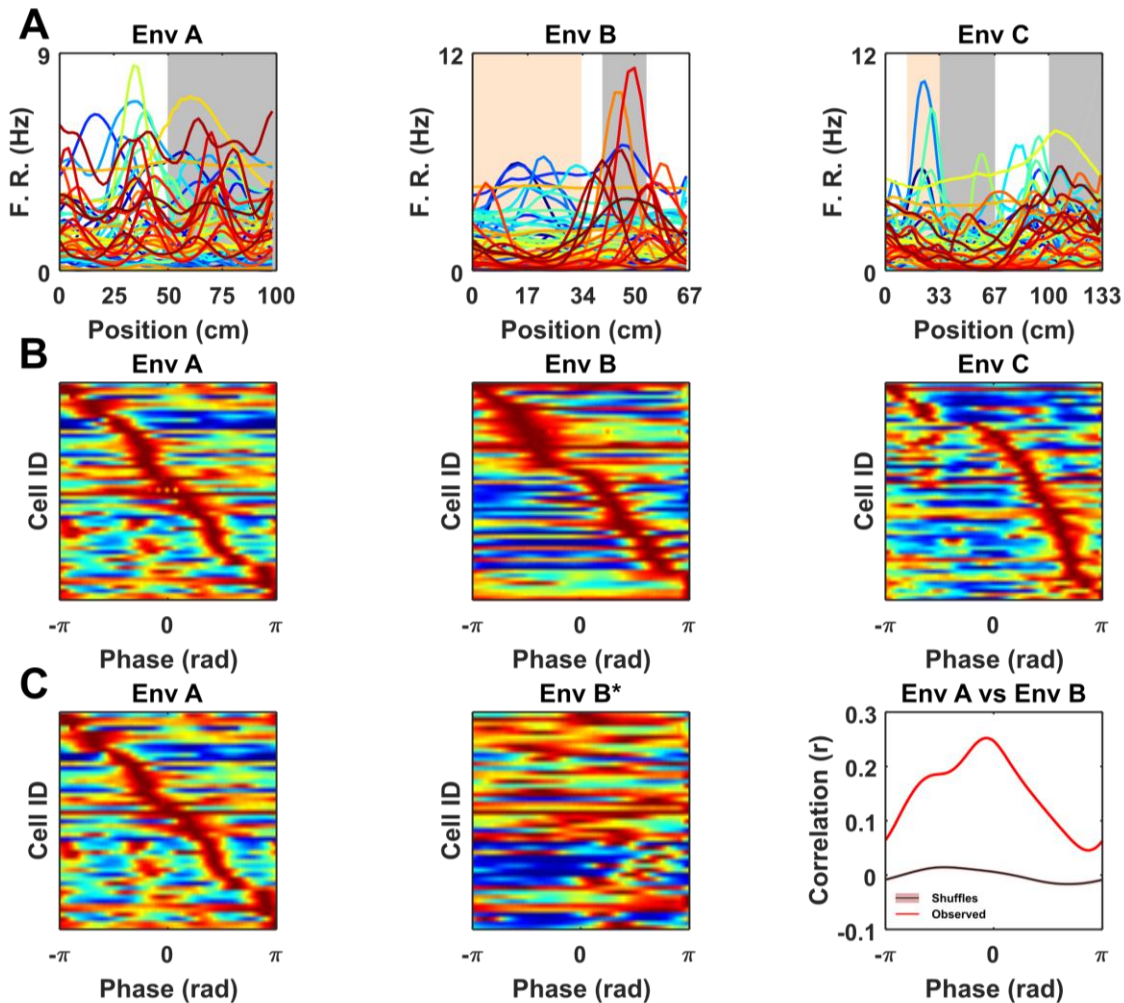

195

196

197 **Figure 4 Non-grid periodic cells were strongly modulated by the frequency of the repetitive segments in**  
 198 **each VR but were not clustered at specific phases within each segment. A**, Rate maps for each color-coded  
 199 cell across VR environments showing mean firing rate as function of location within the repeating segment.  
 200 Note the differences in the peak firing rate and location of the spatial tuning curves across cells. **B**, Ratemaps  
 201 of all cue-locked cells sorted according to location of peak firing. For comparison across environments location  
 202 within each repeated segment has been converted to a phase (radians). Note the sequence of firing within  
 203 each environment with no strong preference for any particular phase. **C**, Ratemaps from environments A (*Left*)  
 204 and B\* (*Middle*) sorted according to the order of their peaks in A. (*Right*) Cross-correlation between A and B\*  
 205 shows a significant peak (vs 1000 shuffles, purple line also indicates shuffle confidence interval), suggesting a  
 206 tendency for the relative phase of ratemaps to be preserved between environment A and B.

## 207 Discussion

208 The core finding presented here is the report of a distinct population of non-grid neurons in rodent mEC  
209 characterised by robust modulation of their firing rate by visual cues presented in linear VR environments –  
210 ‘cue-locked’ cells. Indeed, despite the fact that the visual features differed substantially, the majority of  
211 neurons not only exhibited strong cue locking in multiple environments but also showed a marked tendency  
212 to preserve the relative sequence of their firing fields.

213

214 The observation of these cells leads to two main considerations, one with respect to how experiments are  
215 conducted in VR and one on the nature of these cells. As previously mentioned, VR has become an increasingly  
216 popular tool used to study spatial cognition and its neural basis (Chen et al., 2013; Dombeck et al., 2010;  
217 Domnisoru et al., 2013; Harvey et al., 2009; Campbell et al., 2018; Thurley and Ayaz, 2017). In particular,  
218 several studies of head-fixed mice on VR linear tracks have considered mEC neurons with multiple similarly  
219 sized firing fields to be analogous to grid cells (Campbell et al., 2018; Domnisoru et al., 2013; Schmidt-Hieber  
220 and Häusser, 2014). Clearly in linear VR environments without regularly repeating elements cue-locked cells  
221 would be expected to generate fewer repetitive fields. Nevertheless, our observation that these cells retain  
222 their firing characteristics across environments suggests they would be expected to form multiple fields under  
223 many conditions - leading them to be identified as grid cells. Importantly, these findings do not contradict  
224 conclusions drawn from previous VR grid cell studies. Indeed, many publications using 1D VR grid cell  
225 recordings relied on 2D RW environments for grid cell classification (Campbell et al., 2018; Domnisoru et al.,  
226 2013). Moreover, although the 1D VR environments used by Domnisoru et al., 2013 incorporated regularly  
227 repeating cues these were constrained to sub-sections of the track. Under such circumstances it is unlikely  
228 that cue-locking cells would be confounded with grid cells. Never-the-less, it still appears that the most reliable  
229 means of detecting grid cells is via their characteristic six-fold symmetric firing pattern visualised in a 2D  
230 environment either real or virtual (Chen et al., 2018; Hafting et al., 2005), though even then the expected false  
231 positive error rate is non-negligible (Barry and Burgess, 2017).

232

233 In this study, VR environments consisted of long linear tracks (10m) composed of repetitive cues distributed  
234 at differing frequencies (67, 100 and 133 cm) . As a consequence, the spatial activity of cue-locked cells was  
235 remarkably regular (**Figure 3, Supp. Fig 4-5**), allowing them to be identified by the strength of their periodicity.  
236 Conversely, although we observed that mEC grid cells – identified from open field trials – exhibited multiple  
237 firing fields in VR, we found no evidence for cue-locking, corroborating the widely held view that grid cells are  
238 strongly modulated by self-motion information (Burgess, 2008; Campbell et al., 2018; Carpenter et al., 2015;  
239 Hafting et al., 2005; Winter et al., 2015). In contrast, we found a population of cells showing stable regular

240 firing pattern during VR navigation in register with the available spatial cues. Superficially the visual pattern of  
241 the simplest environment (A) resembles drifting sine gratings. However, sensory-motor feedback between the  
242 animal's movement and the visual scene coupled with the spatial perspective and optic flow provided by other  
243 textures, suggests that the cells were responding in the context of VR navigation. In light of these  
244 considerations, we propose that the striking regular firing pattern exhibited by these cells was predominantly  
245 related to visual cues, and hence we consider them to be "cue-locked". We note that these cells' spatial fields  
246 were not limited to the immediate proximity of cues but spread across the range of possible phases within  
247 each repeated environmental segment (**Figure 4, Supp. Fig 4-5**) in a way that resembled the sequential firing  
248 of an ensemble of grid cells from the same module (Barry et al., 2007; Stensola et al., 2012; Yoon et al., 2016).  
249 Interestingly, our results suggest that such sequential firing pattern was conserved at least between two VR  
250 environments (A and B, **Figure 4**), suggesting that cue-locking cells may encode relative distances from the  
251 cues.

252

253 What might be the identity of the cue-locked cells? One possible interpretation is that these neurons are  
254 boundary vector cells (BVCs) (Barry et al., 2006; Hartley et al., 2000; Lever et al., 2009) or border cells (Solstad  
255 et al., 2008) responding to visual cues that are perceived as a boundary. However, the lack of clear spatial  
256 modulation in the open field trials renders this unlikely as BVC firing fields in the open field are typically  
257 expected to be unitary and elongated – a simple function of the animals allocentric location relative to  
258 environmental boundaries (Hartley et al., 2000; Lever et al., 2009). Without further evidence it is hard to draw  
259 solid conclusions. Still it seems plausible that these cells respond to visual features of intermediate complexity  
260 and may likely be modulated by the egocentric location of the cue relative to the animal. Although open field  
261 recording enclosures often include only a small number of controlled cues like a cue card, it is likely they also  
262 include a large number of uncontrolled cues which are unintentionally present. Due to their nature it is  
263 necessarily hard to quantify the prevalence and efficacy of such uncontrolled cues. These considerations  
264 would account for their relatively simple firing characteristics in the VR in which sensory information is well  
265 controlled and behavioral confounds are reduced in contrast to a more complex activity during open field  
266 foraging.

267

268 Therefore, it falls to future work to further characterise the activity of these cells and the factors they respond  
269 to. On one hand it is obvious that the highly simplified and well controlled environments provided by VR have  
270 a role in this endeavour but equally less constrained open field recordings combined with careful behavioural  
271 tracking will also be important.

272

## Acknowledgments

273

This work was supported by the Wellcome Trust and Royal Society.

274

## 275 References

- 276 Aronov, D., and Tank, D.W. (2014). Engagement of neural circuits underlying 2D spatial navigation in  
277 a rodent virtual reality system. *Neuron* 84, 442–456.
- 278 Banino, A., Barry, C., Uria, B., Blundell, C., Lillicrap, T., Mirowski, P., Pritzel, A., Chadwick, M.J.,  
279 Degris, T., Modayil, J., et al. (2018). Vector-based navigation using grid-like representations in artificial agents.  
280 *Nature* 557, 429–433.
- 281 Barry, C., and Burgess, N. (2017). To be a grid cell: shuffling procedures for determining “gridness.”  
282 *BioRxiv* 230250.
- 283 Barry, C., Lever, C., Hayman, R., Hartley, T., Burton, S., O’Keefe, J., Jeffery, K., and Burgess, N.  
284 (2006). The boundary vector cell model of place cell firing and spatial memory. *Rev. Neurosci.* 17, 71.
- 285 Barry, C., Hayman, R., Burgess, N., and Jeffery, K.J. (2007). Experience-dependent rescaling of  
286 entorhinal grids. *Nat. Neurosci.* 10, 682–684.
- 287 Burak, Y., and Fiete, I.R. (2009). Accurate path integration in continuous attractor network models of  
288 grid cells. *PLOS Comput Biol* 5, e1000291.
- 289 Burgess, N. (2008). Grid cells and theta as oscillatory interference: Theory and predictions.  
290 *Hippocampus* 18, 1157–1174.
- 291 Burgess, C.P., and Burgess, N. (2014). Controlling phase noise in oscillatory interference models of  
292 grid cell firing. *J. Neurosci. Off. J. Soc. Neurosci.* 34, 6224–6232.
- 293 Campbell, M.G., Ocko, S.A., Mallory, C.S., Low, I.I.C., Ganguli, S., and Giocomo, L.M. (2018).  
294 Principles governing the integration of landmark and self-motion cues in entorhinal cortical codes for  
295 navigation. *Nat. Neurosci.* 21, 1096–1106.
- 296 Carpenter, F., Manson, D., Jeffery, K., Burgess, N., and Barry, C. (2015). Grid cells form a global  
297 representation of connected environments. *Curr. Biol.* 25, 1176–1182.
- 298 Chen, G., King, J.A., Burgess, N., and O’Keefe, J. (2013). How vision and movement combine in the  
299 hippocampal place code. *Proc. Natl. Acad. Sci.* 110, 378–383.
- 300 Chen, G., Manson, D., Cacucci, F., and Wills, T.J. (2016). Absence of visual input results in the  
301 disruption of grid cell firing in the mouse. *Curr. Biol.*
- 302 Chen, G., King, J.A., Lu, Y., Cacucci, F., and Burgess, N. (2018). Spatial cell firing during virtual  
303 navigation of open arenas by head-restrained mice. *ELife* 7.
- 304 Dombeck, D.A., Harvey, C.D., Tian, L., Looger, L.L., and Tank, D.W. (2010). Functional imaging of  
305 hippocampal place cells at cellular resolution during virtual navigation. *Nat. Neurosci.* 13, 1433–1440.
- 306 Domnisoru, C., Kinkhabwala, A.A., and Tank, D.W. (2013). Membrane potential dynamics of grid  
307 cells. *Nature* 495, 199–204.
- 308 Hafting, T., Fyhn, M., Molden, S., Moser, M.-B., and Moser, E.I. (2005). Microstructure of a spatial  
309 map in the entorhinal cortex. *Nature* 436, 801–806.
- 310 Hardcastle, K., Ganguli, S., and Giocomo, L.M. (2015). Environmental boundaries as an error  
311 correction mechanism for grid cells. *Neuron* 86, 827–839.

- 312 Hartley, T., Burgess, N., Lever, C., Cacucci, F., and O'Keefe, J. (2000). Modeling place fields in terms  
313 of the cortical inputs to the hippocampus. *Hippocampus* *10*, 369–379.
- 314 Harvey, C.D., Collman, F., Dombeck, D.A., and Tank, D.W. (2009). Intracellular dynamics of  
315 hippocampal place cells during virtual navigation. *Nature* *461*, 941–946.
- 316 Kadir, S.N., Goodman, D.F.M., and Harris, K.D. (2014). High-dimensional cluster analysis with the  
317 masked EM algorithm. *Neural Comput.* *26*, 2379–2394.
- 318 Krupic, J., Bauza, M., Burton, S., Barry, C., and O'Keefe, J. (2015). Grid cell symmetry is shaped by  
319 environmental geometry. *Nature* *518*, 232–235.
- 320 Krupic, J., Bauza, M., Burton, S., and O'Keefe, J. (2018). Local transformations of the hippocampal  
321 cognitive map. *Science* *359*, 1143–1146.
- 322 Lever, C., Burton, S., Jeewajee, A., O'Keefe, J., and Burgess, N. (2009). Boundary vector cells in the  
323 subiculum of the hippocampal formation. *J. Neurosci.* *29*, 9771–9777.
- 324 McNaughton, B.L., Battaglia, F.P., Jensen, O., Moser, E.I., and Moser, M.-B. (2006). Path integration  
325 and the neural basis of the “cognitive map.” *Nat. Rev. Neurosci.* *7*, 663–678.
- 326 Muessig, L., Hauser, J., Wills, T.J., and Cacucci, F. (2015). A developmental switch in place cell  
327 accuracy coincides with grid cell maturation. *Neuron* *86*, 1167–1173.
- 328 Pérez-Escobar, J.A., Kornienko, O., Latuske, P., Kohler, L., and Allen, K. (2016). Visual landmarks  
329 sharpen grid cell metric and confer context specificity to neurons of the medial entorhinal cortex. *ELife* *5*,  
330 e16937.
- 331 Saleem, A.B., Ayaz, A., Jeffery, K.J., Harris, K.D., and Carandini, M. (2013). Integration of visual  
332 motion and locomotion in mouse visual cortex. *Nat. Neurosci.* *16*, 1864–1869.
- 333 Sargolini, F., Fyhn, M., Hafting, T., McNaughton, B.L., Witter, M.P., Moser, M.-B., and Moser, E.I.  
334 (2006). Conjunctive representation of position, direction, and velocity in entorhinal cortex. *Science* *312*, 758–  
335 762.
- 336 Schmidt-Hieber, C., and Häusser, M. (2013). Cellular mechanisms of spatial navigation in the medial  
337 entorhinal cortex. *Nat. Neurosci.* *16*, 325–331.
- 338 Schmidt-Hieber, C., and Häusser, M. (2014). How to build a grid cell. *Phil Trans R Soc B* *369*,  
339 20120520.
- 340 Skaggs, W.E., McNaughton, B.L., Gothard, K.M., and Markus, E.J. (1993). An information-theoretic  
341 approach to deciphering the hippocampal code. In In, (Morgan Kaufmann), pp. 1030–1037.
- 342 Solstad, T., Boccara, C.N., Kropff, E., Moser, M.-B., and Moser, E.I. (2008). Representation of  
343 Geometric Borders in the Entorhinal Cortex. *Science* *322*, 1865–1868.
- 344 Stensola, H., Stensola, T., Solstad, T., Frøland, K., Moser, M.-B., and Moser, E.I. (2012). The entorhinal  
345 grid map is discretized. *Nature* *492*, 72–78.
- 346 Stensola, T., Stensola, H., Moser, M.-B., and Moser, E.I. (2015). Shearing-induced asymmetry in  
347 entorhinal grid cells. *Nature* *518*, 207–212.
- 348 Thurley, K., and Ayaz, A. (2017). Virtual reality systems for rodents. *Curr. Zool.* *63*, 109–119.

349 Winter, S.S., Mehlman, M.L., Clark, B.J., and Taube, J.S. (2015). Passive transport disrupts grid signals  
350 in the parahippocampal cortex. *Curr. Biol.* 25, 2493–2502.

351 Yoon, K., Lewallen, S., Kinkhabwala, A.A., Tank, D.W., and Fiete, I.R. (2016). Grid cell responses in  
352 1D environments assessed as slices through a 2D Lattice. *Neuron* 89, 1086–1099.

353
